# Supplementary material
Source: PubMed Central journal article supplement (PMC5498721)
Supplement: CVI.00068-17_zcd999095489s1.pdf [file CVI.00068-17_zcd999095489s1.pdf]

**Supplemental Table 1. Sequences and molecular weights for the 5 epitopes conjugated to beads based on the overlapping peptide arrays.**

---

| <b>PfSEA-1A epitope</b> | <b>Amino Acid sequence</b> | <b>Molecular weight</b> |
|-------------------------|----------------------------|-------------------------|
| Epitope 1               | NEDRGIYDELLENMCDLYN        | 2.43 kDa                |
| Epitope 2               | NNNMNDIAIGENVIYENDIHENNID  | 2.89 kDa                |
| Epitope 3               | YINNMQDDAMDDIVYDEEEIKSFLDK | 3.54 kDa                |
| Epitope 4               | SYINNDENLQAFDLLDNFHMDDY    | 2.81 kDa                |
| Epitope 5               | IDERKDTECQTDFLLDVSNTNR     | 2.87 kDa                |

**Supplemental Table 2. Summary of Representative Peptide Microarray Data for Epitope Sequence Determination.** Data for Epitope 1 is shown. Row and Column numbers indicate the position of the peptide on the microarray. Sequence chosen for Epitope 1 synthesis is indicated in Bold. Values given for each non-human primate sera are relative fluorescence intensities.

| Row | Column | Peptide Sequence       | M1F   | M3F     | M4F     | M6F      | M7F | M13F    |
|-----|--------|------------------------|-------|---------|---------|----------|-----|---------|
| 2   | 2      | <b>GSGSGSGNEDRGIYD</b> | 0.0   | 0.0     | 0.0     | 0.0      | 0.0 | 0.0     |
| 2   | 3      | <b>SGSGSGNEDRGIYDE</b> | 0.0   | 0.0     | 0.0     | 0.0      | 0.0 | 0.0     |
| 2   | 4      | <b>GSGSGNEDRGIYDEL</b> | 0.0   | 57.0    | 0.0     | 0.0      | 0.0 | 0.0     |
| 2   | 5      | <b>SGSGNEDRGIYDELL</b> | 0.0   | 2,873.0 | 4,601.3 | 5,892.5  | 0.0 | 1,613.0 |
| 2   | 6      | <b>GSGNEDRGIYDELLE</b> | 102.5 | 4,635.8 | 6,436.8 | 11,799.8 | 0.0 | 4,827.0 |
| 2   | 7      | <b>SGNEDRGIYDELLEN</b> | 0.0   | 2,086.5 | 1,928.0 | 5,043.3  | 0.0 | 1,070.0 |
| 2   | 8      | <b>GNEDRGIYDELLEND</b> | 0.0   | 1,365.3 | 1,281.8 | 2,158.8  | 0.0 | 550.5   |
| 2   | 9      | <b>NEDRGIYDELLENDM</b> | 12.0  | 2,339.5 | 1,266.8 | 2,187.5  | 0.0 | 756.5   |
| 2   | 10     | <b>EDRGIYDELLENDMC</b> | 65.8  | 1,948.0 | 2,357.3 | 2,525.8  | 0.0 | 1,119.5 |
| 2   | 11     | <b>DRGIYDELLENDMCD</b> | 0.0   | 1,465.5 | 1,828.5 | 2,575.3  | 0.0 | 901.0   |
| 2   | 12     | <b>RGIYDELLENDMCDL</b> | 0.0   | 2,305.3 | 1,802.3 | 4,661.3  | 0.0 | 609.5   |
| 2   | 13     | <b>GIYDELLENDMCDLY</b> | 0.0   | 530.3   | 636.0   | 2,400.0  | 0.0 | 901.0   |
| 2   | 14     | <b>IYDELLENDMCDLYN</b> | 0.0   | 382.0   | 1,194.0 | 1,161.3  | 0.0 | 1,990.8 |
| 2   | 15     | <b>YDELLENDMCDLYNL</b> | 0.0   | 0.0     | 0.0     | 0.0      | 0.0 | 0.0     |

**Supplemental Table 3. Pearson correlation coefficients (R) between antibody responses to epitopes at 2 weeks. All P values were <0.0001.**

|           | Epitope 1 | Epitope 2 | Epitope 3 | Epitope 4 | Epitope 5 |
|-----------|-----------|-----------|-----------|-----------|-----------|
| Epitope 1 | 1.00      | 0.49      | 0.26      | 0.64      | 0.66      |
| Epitope 2 |           | 1.00      | 0.24      | 0.66      | 0.64      |
| Epitope 3 |           |           | 1.00      | 0.49      | 0.42      |
| Epitope 4 |           |           |           | 1.00      | 0.77      |
| Epitope 5 |           |           |           |           | 1.00      |
